# Supplementary material
Source: Springer Nature journal article supplement (https://www.springermedizin.de/resource/supplementary/12889_2010_3437_MOESM3_ESM.pdf/9488948)

## Females

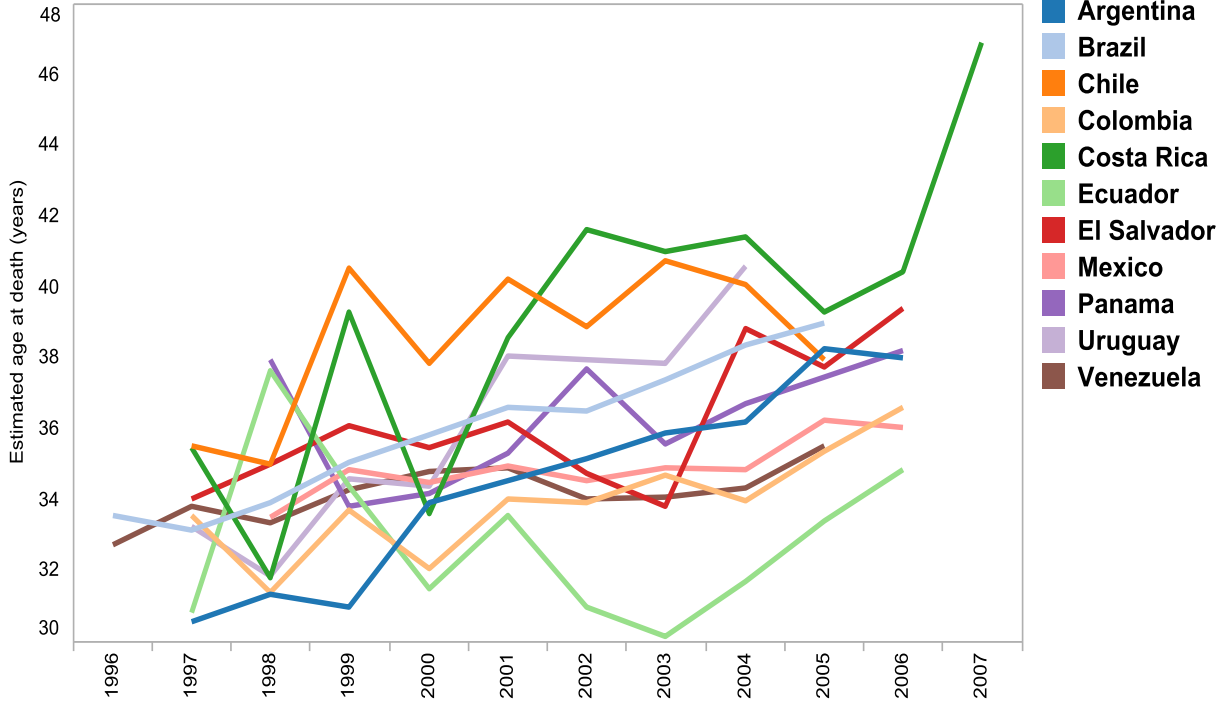

## Males

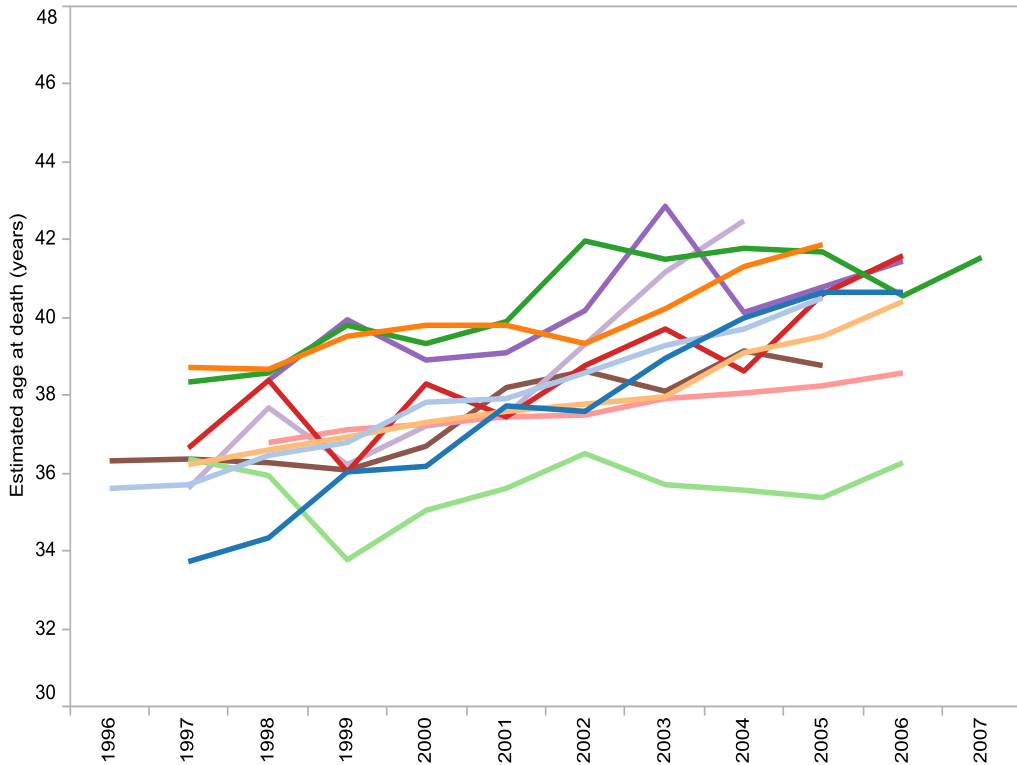

Supplement: MOESM3 [file 9488948]
